# Supplementary material
Source: PubMed Central journal article supplement (PMC3265650)
Supplement: NIHMS345583-supplement-1.pdf [file NIHMS345583-supplement-1.pdf]

## **Supplemental Material**

## Appendix

### List of definitions and abbreviations

|                                |                                                                                                      |
|--------------------------------|------------------------------------------------------------------------------------------------------|
| <i>Collateral source</i>       | Parallel vascular network which provides <i>collateral connection</i> to the ischemic area.          |
| $R_{source}$                   | Resistance of collateral source                                                                      |
| $P_{col}, R_{col}$             | Inflow pressure and resistance of the <i>collateral connection</i>                                   |
| $R_{pre},$                     | Resistance proximal to the takeoff of collateral connection.                                         |
| $R_{post}$                     | Resistance of collateral source distal to the takeoff.                                               |
| $P_a$                          | Arterial pressure                                                                                    |
| $P_v$                          | Venous pressure                                                                                      |
| $R_i$                          | Inflow resistance in the partial occlusion model or collateral resistance in collateral inflow model |
| $P_i$                          | Inflow pressure of the ischemic region distal to $R_i$ or $R_{col}$ .                                |
| $R_{pen}, P_{pen}$             | Resistance and tissue pressure in the penumbra.                                                      |
| $R_{core}, P_{core}$           | Resistance and tissue pressure in the core.                                                          |
| No reflow                      | Cessation of flow when $P_{core} \geq P_i$ ; $rCPP_{core} = 0$ .                                     |
| PONR= ( $P_{core}, P_v, P_a$ ) | Point of no reflow- values of $P_{core}, P_v$ and $P_a$ at which $rCPP_{core}$ becomes zero.         |

For residual direct inflow pressure  $P_i$  calculation was described earlier <sup>2</sup>.

After transition to the collateral inflow  $P_i$  is calculated for decreasing venous pressure  $P_v$ :

For  $P_i > P_v > P_{core}$  and  $P_i > P_v > P_{pen}$

$$P_{i_{33}} = (P_a \cdot R_{post} + P_v \cdot R_{pre} \cdot R_{post} / R_{core} + P_v \cdot R_{pre} \cdot R_{post} / R_{pen} + P_v \cdot R_{pre} + P_v \cdot R_i \cdot R_{source} / R_{core} + P_v \cdot R_i \cdot R_{source} / R_{pen}) / (R_i \cdot R_{source} / R_{core} + R_i \cdot R_{source} / R_{pen} + R_{source} + R_{pre} \cdot R_{post} / R_{core} + R_{pre} \cdot R_{post} / R_{pen})$$

For  $P_i > P_{core} > P_v$  and  $P_i > P_v > P_{pen}$ :

$$P_{i_{23}} = (P_a \cdot R_{post} + P_{core} \cdot R_{pre} \cdot R_{post} / R_{core} + P_v \cdot R_{pre} \cdot R_{post} / R_{pen} + P_v \cdot R_{pre} + P_{core} \cdot R_i \cdot R_{source} / R_{core} + P_v \cdot R_i \cdot R_{source} / R_{pen}) / (R_i \cdot R_{source} / R_{core} + R_i \cdot R_{source} / R_{pen} + R_{source} + R_{pre} \cdot R_{post} / R_{core} + R_{pre} \cdot R_{post} / R_{pen})$$

For  $P_i > P_{core} > P_v$  and  $P_i > P_{pen} > P_v$ :

$$P_{i_{22}} = (P_a \cdot R_{post} + P_{core} \cdot R_{pre} \cdot R_{post} / R_{core} + P_{core} \cdot R_{pre} \cdot R_{post} / R_{pen} + P_v \cdot R_{pre} + P_{core} \cdot R_i \cdot R_{source} / R_{core} + P_{core} \cdot R_i \cdot R_{source} / R_{pen}) / (R_i \cdot R_{source} / R_{core} + R_i \cdot R_{source} / R_{pen} + R_{source} + R_{pre} \cdot R_{post} / R_{core} + R_{pre} \cdot R_{post} / R_{pen})$$

For  $P_i < P_{core} > P_v$  and  $P_i > P_v > P_{pen}$ :

$$P_{i_{13}} = (P_a \cdot R_{post} + P_v \cdot R_{pre} \cdot R_{post} / R_{pen} + P_v \cdot R_{pre} + P_v \cdot R_i \cdot R_{source} / R_{pen}) / (R_i \cdot R_{source} / R_{pen} + R_{source} + R_{pre} \cdot R_{post} / R_{pen})$$

For  $P_i < P_{core} > P_v$  and  $P_i > P_{pen} > P_v$ :

$$P_{i_{12}} = (P_a \cdot R_{post} + P_{core} \cdot R_{pre} \cdot R_{post} / R_{pen} + P_v \cdot R_{pre} + P_{core} \cdot R_i \cdot R_{source} / R_{pen}) / (R_i \cdot R_{source} / R_{pen} + R_{source} + R_{pre} \cdot R_{post} / R_{pen})$$

For  $P_i < P_{core} > P_v$  and  $P_i < P_{pen} > P_v$ :

$$P_{i_{11}} = (P_a - P_v) / (R_{post} + R_{pre}) \cdot R_{post} + P_v$$
